# Supplementary material for: Palladium single-atom catalysts synthesized by a gas-assisted redispersion strategy for efficient benzaldehyde hydrogenation
Source: Royal Society of Chemistry journal article supplement (doi:10.1039/d3cc01177a), 2023-01-01
Supplement: d3cc01177a1.pdf [file d3cc01177a1.pdf]

## Supplementary information

### **Palladium single-atom catalysts synthesized by gas-assisted redispersion strategy for efficient benzaldehyde hydrogenation**

*Lini Yang*<sup>a</sup>, *Ling Li*<sup>a</sup>, *Shuai Qin*<sup>a</sup>, *Jingwang Zhang*<sup>a</sup>, *Yue Wang*<sup>a</sup>, *Xuetao Qin*<sup>c</sup>,  
*XiangBin Cai*<sup>d</sup>, *Jiangyong Diao*<sup>b</sup>, *Hongyang Liu*<sup>b\*</sup>

<sup>a</sup> Department of Chemistry, Liaoning University, Shenyang, Liaoning 110036, China.  
66 Chongshan Road.

<sup>b</sup> Shenyang National Laboratory for Materials Science, Institute of Metal Research,  
Chinese Academy of Sciences, Shenyang 110016, P. R. China.

<sup>c</sup> Beijing National Laboratory for Molecular Sciences, College of Chemistry and  
Molecular Engineering and College of Engineering, and BIC-ESAT, Peking University,  
Beijing 100871, P. R. China.

<sup>d</sup> Department of Physics and Center for Quantum Materials, Hong Kong University of  
Science and Technology, Clear Water Bay, Kowloon, Hong Kong SAR, P. R. China.

Corresponding Author

\*E-mail: [liuhy@imr.ac.cn](mailto:liuhy@imr.ac.cn) ([Hongyang Liu](#)).

## Experimental

### 2.1 Chemicals

Pd precursor ( $\text{Pd}(\text{NO}_3)_2$  solution), benzaldehyde, benzyl alcohol, n-octane was purchased from Alfa Aesar. Isopropanol, ethanol, tetrahydrofuran, nitric acid, sodium carbonate was purchased from Sinopharm Chemical Reagent Co., Ltd. Dodecane, absolute ethanol, methanol was purchased from Aladdin.

### 2.2 Synthesis of catalysts

**Synthesis of  $\text{Pd}_{\text{NP}}/\text{G}$ :**  $\text{Pd}_{\text{NP}}/\text{G}$  was synthesized by deposition precipitation. First, weigh 200 mg of graphene in a flask and add 30 mL of deionized water and disperse it by ultrasonic for half an hour to make it well dispersed, adjust the pH value to 10 with 0.25 M of  $\text{Na}_2\text{CO}_3$  solution. Then measure 50  $\mu\text{L}$  of  $\text{Pd}(\text{NO}_3)_2$  solution (8 mg/mL) into a 5 mL centrifuge tube, dilute with 4 mL of deionized water, sonicate for 2-3 min and add  $\text{Na}_2\text{CO}_3$  solution to adjust the pH value to neutral.  $\text{Pd}(\text{NO}_3)_2$  solution was slowly added dropwise to the graphene dispersion at room temperature, then heated to 100 °C and reacted for 1 h. After it cooled to room temperature, it was filtered, washed with deionized water to neutral, and dried at 60 °C for 24 h. The sample was reduced by  $\text{H}_2$  at 200 °C for 2 h.

**Synthesis of  $\text{Pd}_{\text{SA}}/\text{G}$ :** ( $\text{Pd}_{\text{SA}}/\text{G}$ ) were prepared by the nitric acid vapor method under mild conditions. Weigh  $\text{Pd}_{\text{NP}}/\text{G}$  (80 mg) flat on the bottom of the quartz evaporation cup, measure 5.5 mL of  $\text{HNO}_3$  into the Teflon liner, and put the quartz evaporation cup into the Teflon liner, and then put the liner into the hydrothermal reactor. Then react at 80 °C for 3 h, cool to room temperature and take out. dry at 60 °C for 12 h, and reduce  $\text{H}_2$  at 200 °C for 1 h.

**Synthesis of  $\text{Pd}/\text{ZnO}$  and  $\text{Pd}/\text{CeO}_2$ :**  $\text{Pd}/\text{ZnO}$  and  $\text{Pd}/\text{CeO}_2$  is prepared in the same way as  $\text{Pd}_{\text{NP}}/\text{G}$ . except that it is reacted at 90 °C for 2 h.

**Synthesis of  $\text{ND}@G$ :** The  $\text{ND}@G$  hybrid support with unique structure was obtained by the calcination of pristine nanodiamonds, as illustrated in our previous studies. the  $\text{ND}@G$  nanocarbon had core-shell structure with the nanodiamond core covered by few layers defect-rich graphene shell. Nanodiamond (ND) powders (Beijing Grish Hitech Co., China) were annealed at 1100 °C for 4 h in Ar flow (100 mL  $\text{min}^{-1}$ ) and then purified with hydrochloric acid.

**Synthesis of Pd<sub>NP</sub>/ND@G:** Pd<sub>NP</sub>/ND@G is prepared in the same way as Pd<sub>NP</sub>/G.

**Synthesis of Pd<sub>SA</sub>/ND@G:** Pd<sub>SA</sub>/ND@G is prepared in the same way as Pd<sub>NP</sub>/G.

### 2.3 Characterization

Prior to characterization and catalytic testing, all catalysts were reduced by H<sub>2</sub> at 200 °C. The reduced catalyst samples were characterized by transmission electron microscopy (TEM) and the high-resolution TEM (HRTEM), TEM and HRTEM images were collected on a FEI Tecnai G2 F20 microscope. Aberration-corrected high-resolution transmission electron microscopy images (AC-HAADF-STEM) were obtained on a JEOL JEM ARM 200CF aberration-corrected cold field-emission scanning transmission electron microscope operating at 200 kV. X-ray absorption spectra (XAS) at the Pd K-edge were obtained at the BL14W1 station in Shanghai Synchrotron Radiation Facility, China. The electron storage ring was operated at 3.5 GeV with a maximum current of 250 mA. Diffuse reflectance infrared Fourier transform (DRIFT) spectra were collected on Thermo Scientific Nicolet IZ10 Fourier transform infrared spectrometer equipped. For example, the catalyst diluted with KBr (mass ratio is about 1:45) was placed in the in-situ pool and pre-treated in hydrogen gas (10% H<sub>2</sub>/He) at 200 °C for 1 h. Cooling to 303 K under He flow, adsorbent (10% CO/He) was introduced to the chamber until adsorption saturation. DRIFTS were continuously recorded with 64 scans at 4 cm<sup>-1</sup> resolution during the He flow purging.

### 2.4 Catalytic evaluation

In the reaction of selective hydrogenation of benzaldehyde, 50 μL of benzaldehyde and 20 mg of catalyst were added to a Schlenk glass vessel tube containing 10 mL of ethanol and 50 μL of n-octane mixed solvent. The reaction was performed at 60 °C with a stirring speed of 800 rpm. The product was analysed by a gas chromatograph (Agilent 7890A) with a HP-PLOT AL/S (HP-plot 19091J-413, Agilent, 30 m× 320 μm× 0.25 μm) capillary column with N<sub>2</sub> as the carrier gas and n-octane as internal standards.

Benzaldehyde conversion and selectivity to benzyl alcohol were calculated as follows:

$$\text{Conversion} = \frac{n_{\text{initial benzaldehyde}} - n_{\text{residual benzaldehyde}}}{n_{\text{initial benzonitrile}}} \times 100\%$$

$$\text{Selectivity}_{\text{benzyl alcohol}} = \frac{n_{\text{produced benzyl alcohol}}}{n_{\text{converted benzaldehyde}}} \times 100\%$$

Reaction mass rate of target product was calculated by the formula as follows:

$$\text{Reaction rate} = \frac{1}{m} \cdot \frac{dn_p}{dt} [\text{mol} \cdot \text{g}^{-1} \cdot \text{h}^{-1}]$$

$n_p$  is Amount of increase in target product over the dt time (mol), m is the catalyst quality(g),  $t$  is reaction time(h),

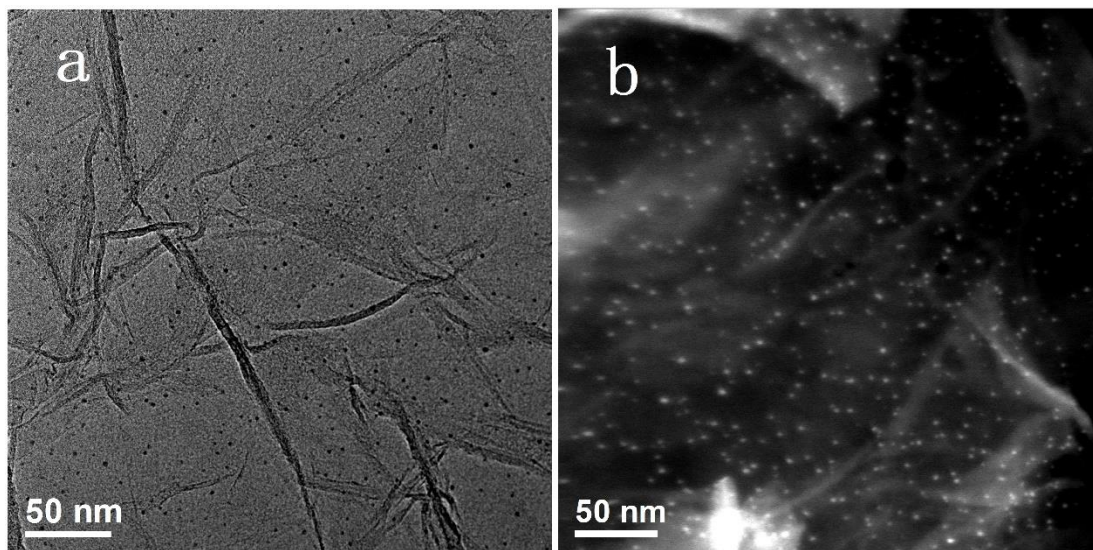

**Figure S1.** HRTEM (a) and HAADF-STEM (b) images of as-prepared Pd-NPs supported on Graphene (0.2 wt.%Pd<sub>NP</sub>/G).

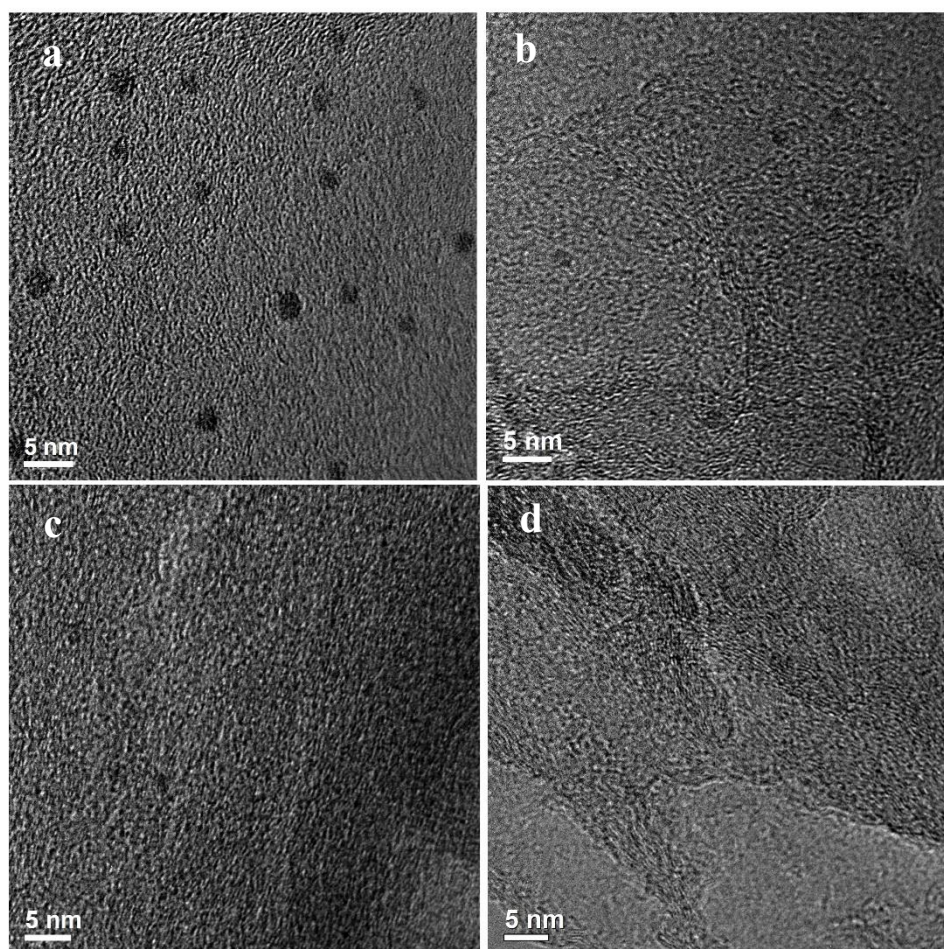

**Figure S2.** HRTEM images of Pd<sub>NP</sub>/G (a), Pd<sub>NP+SA</sub>/G (b), Pd<sub>C+SA</sub>/G (c) and Pd<sub>SA</sub>/G (d).

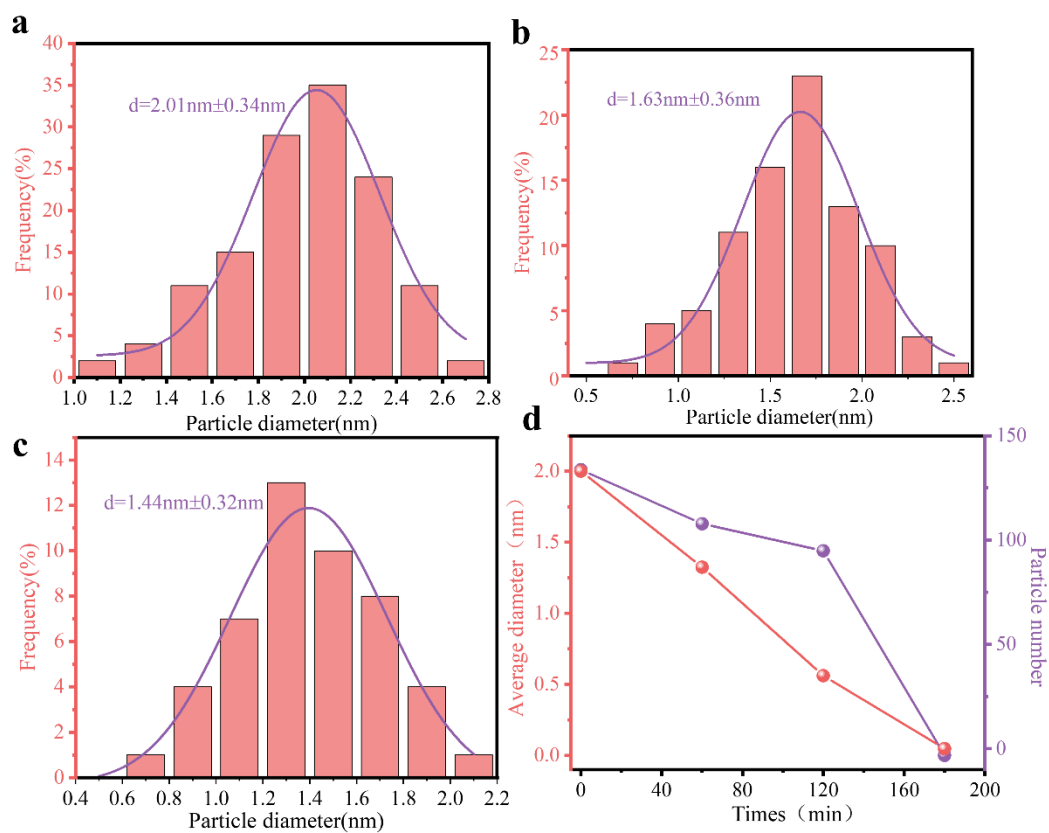

**Figure S3.** Particle size distribution of Pd<sub>NP</sub>/G (a), Pd<sub>NP+SA</sub>/G (b), Pd<sub>C+SA</sub>/G (c) and Average diameter and number of particles versus nitric acid steam treatment time (d).

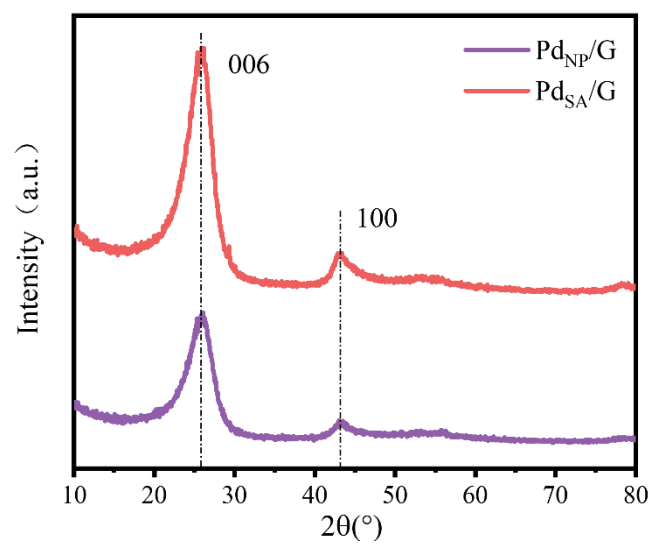

**Figure S4.** XRD spectra of Pd<sub>SA</sub>/G and Pd<sub>NP</sub>/G



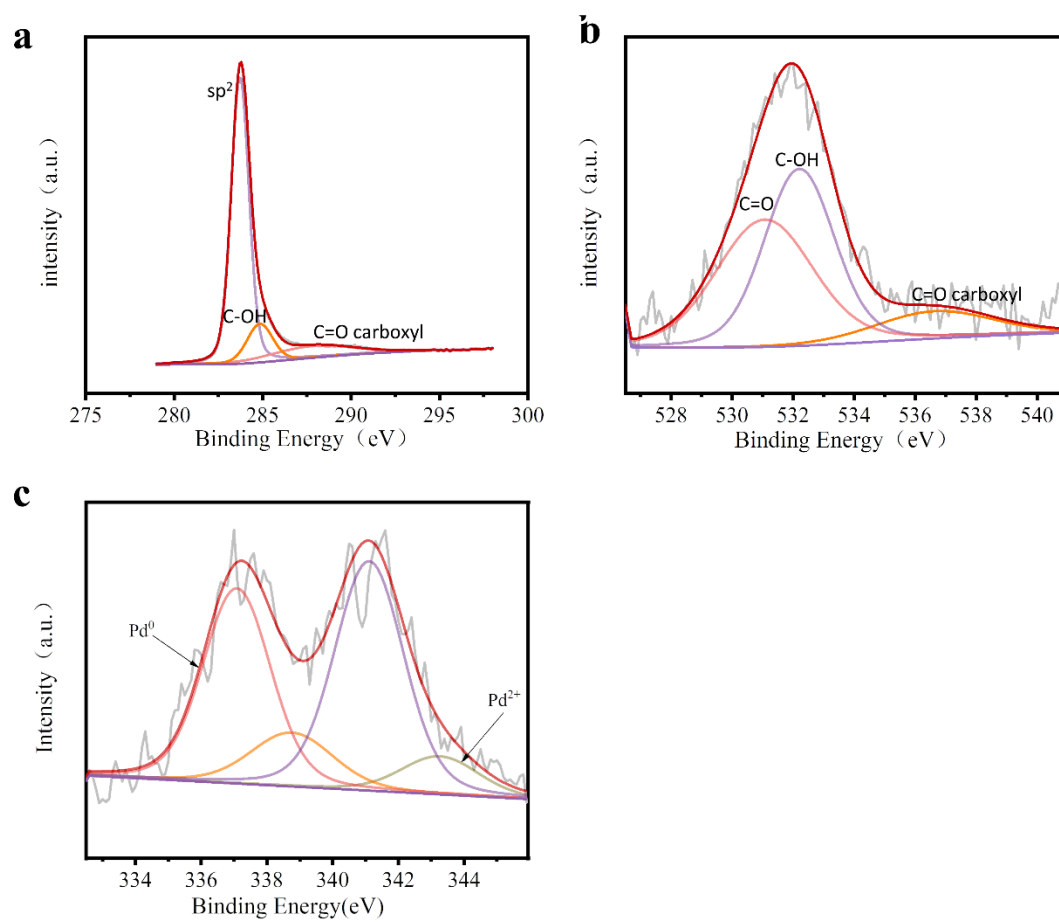

**Figure S5.** XPS spectrums for the (a) C 1s, (b) O 1s, (c) Pd 3d regions of Pd<sub>S</sub>A/G.

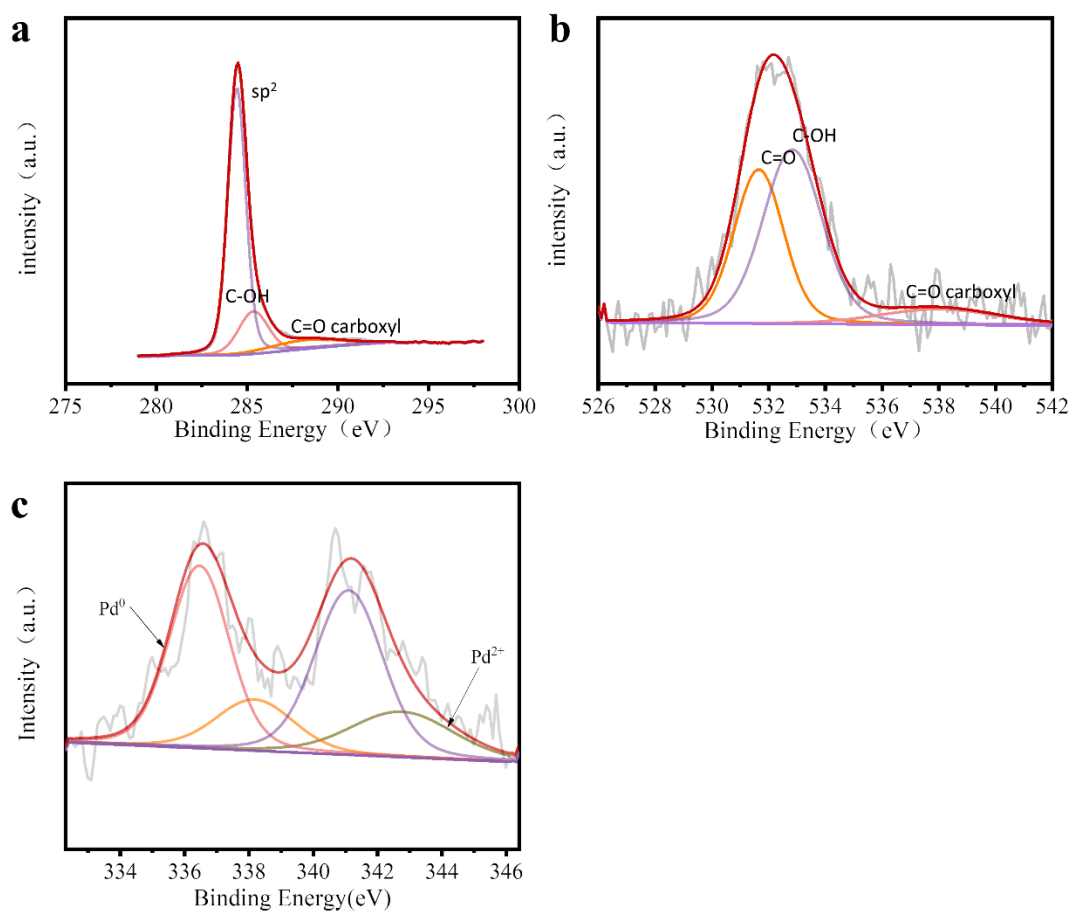

**Figure S6.** XPS spectrums for the (a) C 1s, (b) O 1s, (c) Pd 3d regions of Pd<sub>NP</sub>/G.

**Table S1.** Pd 3d XPS data of Pd<sub>NP</sub>/G and Pd<sub>SA</sub>/G.

| Sample | Pd <sup>0</sup> (eV) |       | Pd <sup>2+</sup> (eV) |       |
|--------|----------------------|-------|-----------------------|-------|
| PdNP/G | 336.4                | 341.0 | 338.2                 | 342.8 |
| PdSA/G | 337.1                | 341.2 | 338.6                 | 343.2 |

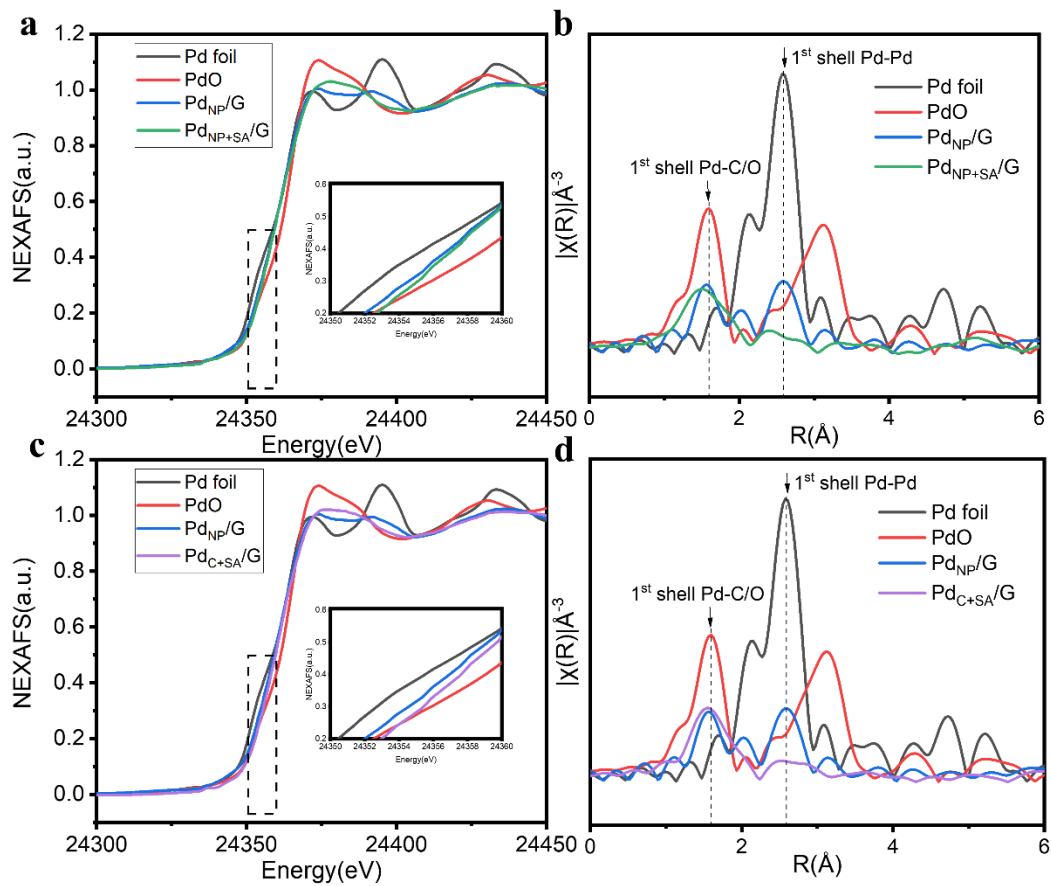

**Figure S7.** Pd K-edge XANES spectra (a) and FT  $k^3$ -weighted Pd K-edge EXAFS spectra (b) of Pd foil, PdO, and Pd<sub>NP</sub>/G, Pd<sub>NP+SA</sub>/G. Pd K-edge XANES spectra (c) and FT  $k^3$ -weighted Pd K-edge EXAFS spectra (d) of Pd foil, PdO, and Pd<sub>NP</sub>/G, Pd<sub>C+SA</sub>/G.

**Table S2.** EXAFS parameters of different samples

| Sample                 | Shell  | Bond length (Å) | Coordination Number | $\sigma^2$ (Å <sup>2</sup> ) | E0 shift (eV) | R-factor (*10 <sup>-3</sup> ) |
|------------------------|--------|-----------------|---------------------|------------------------------|---------------|-------------------------------|
| Pd foil                | Pd-Pd  | 2.74            | 12                  | 0.005                        | 8.5           | 2.5                           |
| PdO                    | Pd-O   | 2.01            | 4                   | 0.001                        | 2.0           | 8.9                           |
| Pd <sub>NP</sub> /G    | Pd-O/C | 1.99            | 1.5                 | 0.006                        | 7.9           | 19.9                          |
|                        | Pd-Pd  | 2.73            | 3.7                 | 0.006                        |               |                               |
| Pd <sub>NP+SA</sub> /G | Pd-O/C | 1.99            | 2.1                 | 0.009                        | 10.1          | 6.5                           |
|                        | Pd-Pd  | 2.72            | 2.3                 | 0.004                        |               |                               |
| Pd <sub>C+SA</sub> /G  | Pd-O/C | 2.01            | 2.5                 | 0.004                        | 8.6           | 6.0                           |
|                        | Pd-Pd  | 2.74            | 1.5                 | 0.005                        |               |                               |
| Pd <sub>SA</sub> /G    | Pd-O/C | 2.01            | 3.1                 | 0.003                        | 4.3           | 3.1                           |
|                        | Pd-Pd  | 2.74            | 0.7                 | 0.008                        |               |                               |

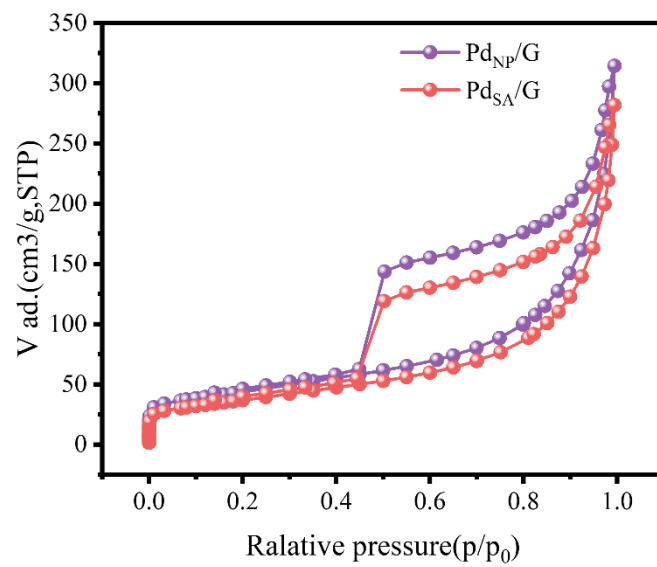

**Figure S8.** N<sub>2</sub> adsorption/desorption isotherms of Pd<sub>NP</sub>/G and Pd<sub>SA</sub>/G.

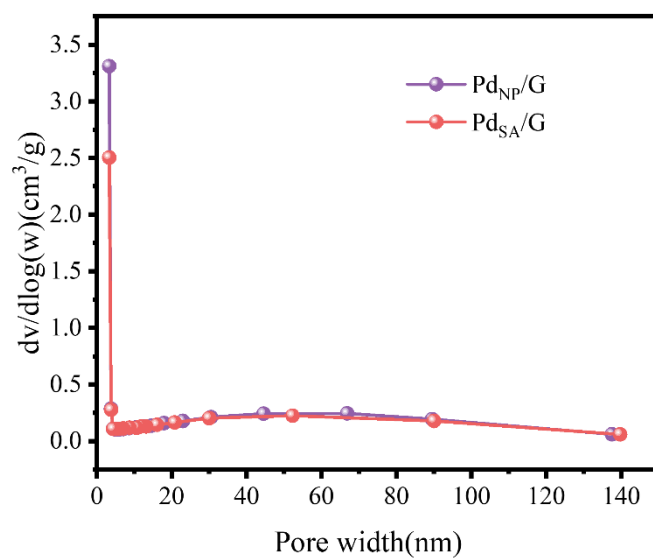

**Figure S9.** Pore size distribution of Pd<sub>NP</sub>/G and Pd<sub>SA</sub>/G

**Table S3.** Physical properties of Pd<sub>NP</sub>/G and Pd<sub>SA</sub>/G.

| Sample              | S <sub>BET</sub> (m <sup>2</sup> g <sup>-1</sup> ) | V <sub>pore</sub> (cm <sup>-3</sup> g <sup>-1</sup> ) | Pore size(nm) |
|---------------------|----------------------------------------------------|-------------------------------------------------------|---------------|
| Pd <sub>NP</sub> /G | 154.32                                             | 0.49                                                  | 11.2          |
| Pd <sub>SA</sub> /G | 130.93                                             | 0.44                                                  | 11.7          |

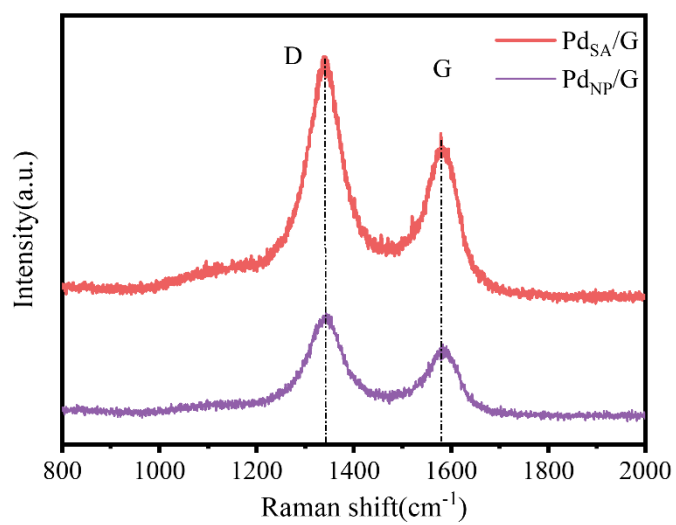

**Figure S10.** Raman spectra of Pd<sub>NP</sub>/G and Pd<sub>SA</sub>/G.

**Table S4.**  $I_D/I_G$  values for Pd<sub>NP</sub>/G and Pd<sub>SA</sub>/G

| Sample             | Pd <sub>NP</sub> /G | Pd <sub>SA</sub> /G |
|--------------------|---------------------|---------------------|
| Value of $I_D/I_G$ | 1.335               | 1.473               |

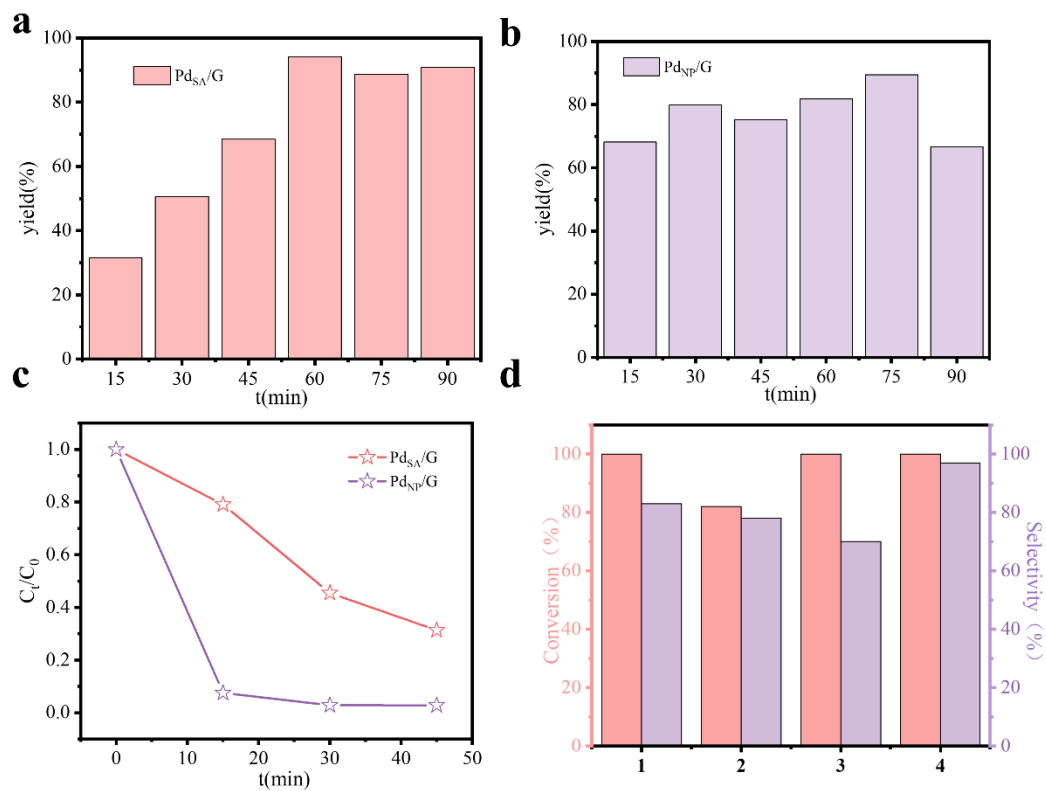

**Figure S11.** Catalytic performance of samples. Yield of the (a) Pd<sub>SA</sub>/G, (b) Pd<sub>NP</sub>/G, Hydrodehalogenation kinetics of benzaldehyde by Pd/G(c), Catalytic performance of 1: Pd<sub>NP</sub>/G, 2: Pd<sub>NP+SA</sub>/G, 3: Pd<sub>C+SA</sub>/G and 4: Pd<sub>SA</sub>/G.



**Table S5.** Optimization of solvent

| <b>Serial number</b> | <b>solvent</b> | <b>Conv. (%)</b> | <b>Sel. (%)</b> |
|----------------------|----------------|------------------|-----------------|
| 1                    | ethanol        | 100              | 88.56           |
| 2                    | methanol       | 99.31            | 87.1            |
| 3                    | Isopropanol    | 54.83            | 94.55           |
| 4                    | n-hexane       | 1.42             | 89.5            |
| 5                    | Dodecane       | 17.72            | 59.01           |
| 6                    | THF            | 3.8              | 84.3            |

**Table S6.**ICP-OES of different nanocarbon catalysts

| Sample              | Theoretical Pd loading/wt.% | Actual Pd loading/wt.% |
|---------------------|-----------------------------|------------------------|
| Pd <sub>NP</sub> /G | 0.2                         | 0.19                   |
| Pd <sub>SA</sub> /G | -                           | 0.09                   |

**Table S7.** Catalytic performance over various catalysts.

| Catalysts                              | Metal load(wt.%) | T (°C) | P (MPa) | TOF   | Conv. (%) | Sel. (%) | Ref.      |
|----------------------------------------|------------------|--------|---------|-------|-----------|----------|-----------|
| Pd <sub>SA</sub> /G                    | 0.09             | 60     | 0.7     | 2959  | 99        | 97       | This work |
| Pd <sub>NP</sub> /G                    | 0.19             | 60     | 0.7     | 2762  | 100       | 83       | This work |
| Pd <sub>1</sub> /TiO <sub>2</sub>      | 1.5              | 25     | -       | 1002  | 100       | -        | 1         |
| Pd <sub>SA+C</sub> /TiO <sub>2</sub>   | 4.8              | 25     | 0.1     | 16288 | 100       | 98       | 2         |
| Pd/@-ZrO <sub>2</sub> /AC              | 1                | 40     | 0.7     | -     | 100       | 98.1     | 3         |
| Pd/C                                   | 5                | 25     | 0.1     | 1062  | 100       | -        | 4         |
| Rh/C                                   | 5                | 25     | 0.1     | 520   | 100       | -        | 4         |
| Ni/Al <sub>2</sub> O <sub>3</sub> -SiC | 16               | 90     | 2       | -     | 99.3      | >90      | 5         |
| Ni/Al <sub>2</sub> O <sub>3</sub>      | 16               | 90     | 2       | -     | 97.5      | >90      | 5         |
| Pd/GNP                                 | 0.5              | 50     | 0.2     | -     | 70        | 94       | 6         |
| Pd-Ru/NGC                              | 1.63             | 40     | 0.5     | -     | 100       | 89.6     | 7         |
| Pd/NGC                                 | 1.5              | 40     | 0.5     | -     | 99.3      | 41.9     | 7         |

## Reference

- [1] P. Liu, Y. Zhao, R. Qin, S. Mo, G. Chen, L. Gu, D. M. Chevrier, P. Zhang, Q. Guo, D. Zang, B. Wu, G. Fu and N. Zheng, *Science (New York, N.Y.)*, 2016, 352, 797-801.
- [2] L. Kuai, Z. Chen, S. Liu, E. Kan, N. Yu, Y. Ren, C. Fang, X. Li, Y. Li and B. Geng, *Nat Commun*, 2020, 11, 48.
- [3] Y. Zhang, J. Zhou, K. Li and M. J. C. T. Lv, 2020.
- [4] Y. Song, U. Sanyal, D. Pangothra, J. D. Holladay and J. A. J. J. o. C. Lercher, 2018, 359, 68-75.
- [5] K. Li, Y. Jiao, Z. Yang, J. J. J. o. M. S. Zhang and *Technology*, 2019, 35, 161-169.
- [6] S. Capelli, S. Cattaneo, M. Stucchi, B. D. Vandegheuchte, A. Chiericato, A. Villa and L. Prati, 2022, 12, 251.
- [7] R. M. Mironenko, O. B. Belskaya, T. I. Gulyaeva, M. V. Trenikhin and V. A. J. C. T. Likholobov, 2016, 279, 2-9.
